# Supplementary material for: Application of reduced graphene oxide-based actuators for real-time chemical sensing of liquid and vapour phase contaminants
Source: Royal Society of Chemistry journal article supplement (doi:10.1039/d1nj02988f), 2021-01-01
Supplement: d1nj02988f1.pdf [file d1nj02988f1.pdf]

Supplementary Information

Application of Reduced Graphene Oxide-Based Actuator for Real-time Chemical Sensing of Liquid and Vapour Phase Contaminants

Arindom Bikash Neog,<sup>a</sup> Raj Kumar Gogoi,<sup>a</sup> Priyamjeet Deka,<sup>c</sup> Tukhar Jyoti Konch,<sup>a</sup> Barsha Rani Bora<sup>a</sup> and Kalyan Raidongia<sup>a,b\*</sup>

<sup>a</sup>Department of Chemistry, Indian Institute of Technology Guwahati, Guwahati-781039, Assam, India.

<sup>b</sup>Centre for Nanotechnology, Indian Institute of Technology Guwahati, Guwahati-781039, Assam, India

<sup>c</sup>Centre for Energy, Indian Institute of Technology Guwahati, Guwahati-781039, Assam, India

\*E-mail: [k.raidongia@iitg.ac.in](mailto:k.raidongia@iitg.ac.in)

### **Preparation of graphene oxide and reduced graphene oxide:**

Modified Hummers' method was followed for the synthesis of Graphene Oxide (GO). 2 g of graphite powder was added to 50 ml of concentrated sulphuric acid<sup>1</sup>, maintaining a temperature below 5 °C. Under constant stirring, 6 g of potassium permanganate (KMnO<sub>4</sub>) was slowly added and stirred for additional 2 hours at 35 °C. This step was followed by slow addition of 100 ml of deionised (DI) water, after which 10 ml of hydrogen peroxide (H<sub>2</sub>O<sub>2</sub>) was added under constant stirring. The yellow slurry formed was first washed with 10 % HCl solution and later with acetone until the filtrate's pH value increased above 5. For the preparation of reduced graphene oxide (r-GO), GO obtained by the above method was dispersed (0.5 mg/ml) in dimethylformamide (DMF) and refluxed at 153 °C for 2 hours.<sup>2</sup>

### **Preparation of r-GO membranes:**

40 ml of the dispersion of r-GO in DMF was subjected to vacuum filtration through a polytetrafluoroethylene (PTFE) membrane of pore size 5 µm. This was followed by drying it at 70 °C for 2 hours. After air drying, reconstructed r-GO membranes could be peeled off easily from the PTFE membrane.

### **Preparation of agar membranes:**

1 mg/ml mixture of agar in DI water was heated at 100 °C until we get a clear solution, which was then poured into a petri dish. The solution cooled down to room temperature and formed a gel-like substance which was then dried in an oven at 70 °C. A semi-transparent agar membrane could be peeled off easily from the petri dish.

### **Preparation of r-GO/agar bilayer membrane:**

Firstly, 40 ml of r-GO (from 0.5 mg/ml GO dispersion) dispersion was vacuum filtered through a PTFE membrane resulting in a greyish-black membrane. After the r-GO membrane appeared to be dried, 20 ml of agar dispersion was filtered through it. Agar dispersion itself was prepared by mixing agar powder in DMF (1 mg/ml) under probe sonication (Labman, Model: PRO-650)

for 30 minutes (1 s on & 1 s off pulse). Thus prepared bilayer membrane of r-GO/agar could be easily peeled off from the PTFE membrane by heating in a hot air oven at 70 °C for 2 hours.

**Characterization:**

Atomic Force Microscope (AFM) (Make: Oxford; Model: Cypher) was used for characterizing nanosheets of GO and r-GO. Morphology and cross-section of the membranes were examined by Field Emission Scanning Electron Microscope (FESEM) (Make: Zeiss, Model: Sigma). Membranes of r-GO and GO were characterized by Raman Spectroscopy (Make: Horiba Jobin Vyon, Model: LabRam HR). Bruker D-205505 Cu-K $\alpha$  radiation ( $\lambda = 1.5406 \text{ \AA}$ ) was employed for X-ray diffraction studies. The shape transformations of the bilayer membranes was filmed using a digital camera, Nikon D 5200. The stress-strain curves were recorded in a 5kN Electromechanical Universal Testing Machine (Make: Zwick Roell : Z005TN).

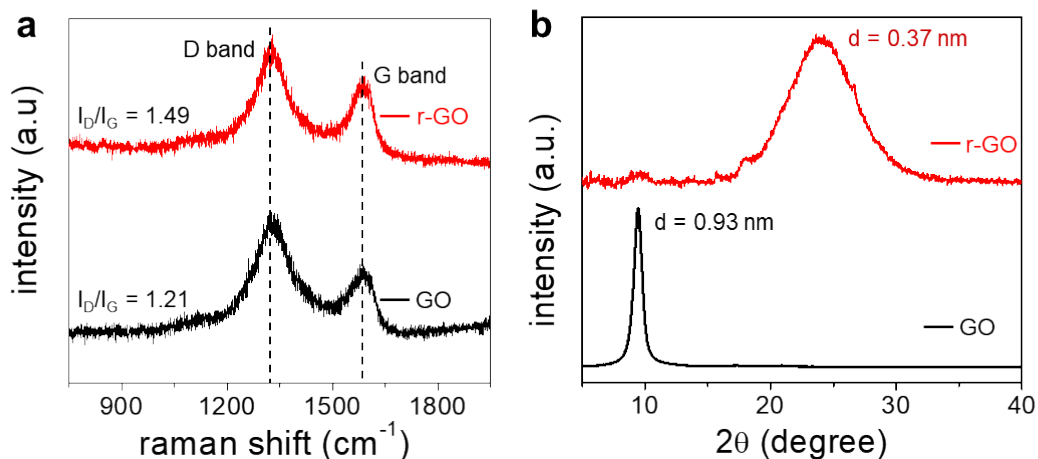

**Figure S1:** (a) Raman spectra and (b) XRD patterns of GO and r-GO membranes.

The G band in the Raman spectra signifies in-plane vibrations of  $sp^2$  bonded carbon atoms whereas the D band denotes out of plane vibrations attributed to the presence of structural defects.  $I_D/I_G$  is a measure of the defects present on the graphene structure. The peak of the D band for GO membrane was found at  $1335\text{ cm}^{-1}$  and the peak of the G band at  $1592\text{ cm}^{-1}$ . For the r-GO sample, the peak of D band was found to be at same position ( $1335\text{ cm}^{-1}$ ) while that of G band was shifted downwards to  $1587\text{ cm}^{-1}$ .<sup>3</sup> The  $I_D/I_G$  ratio was calculated for GO and r-GO to be 1.21 and 1.49 respectively,<sup>4</sup> where  $I_D$  is the intensity of the D band and  $I_G$  is the intensity of the G band. The increase in the  $I_D/I_G$  value for r-GO confirms increasing defect concentrations during the reduction process of GO to r-GO.<sup>5</sup>

In case of XRD studies, the GO membrane showed a sharp diffraction peak at  $2\theta$  value of  $9.4^\circ$  corresponding to an interplanar spacing of 0.93 nm. A broad diffraction pattern with peak corresponding to an interplanar spacing of 0.37 nm (at  $2\theta$  value of  $24^\circ$ ) appeared in the XRD pattern of r-GO membrane.

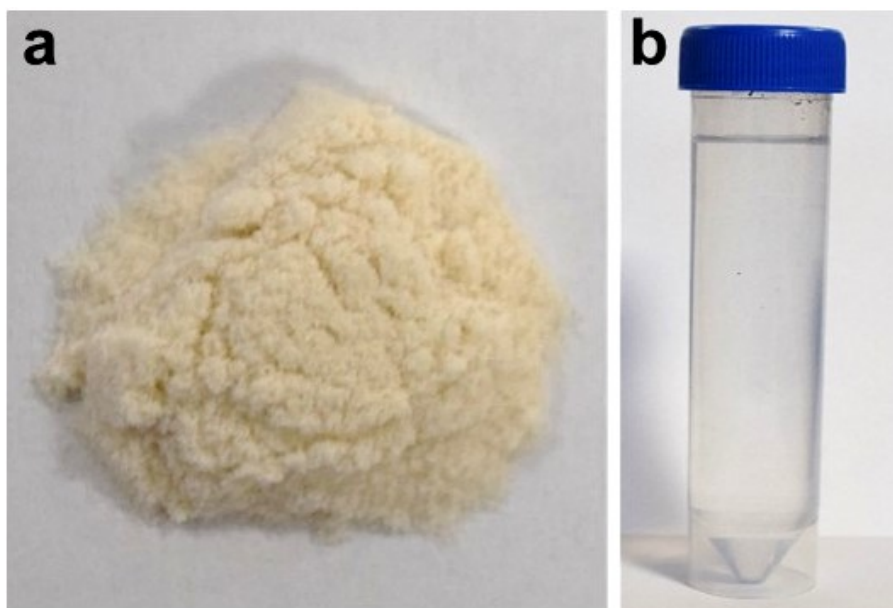

**Figure S2:** Digital photos of (a) agar powder and (b) agar dispersion in DMF.

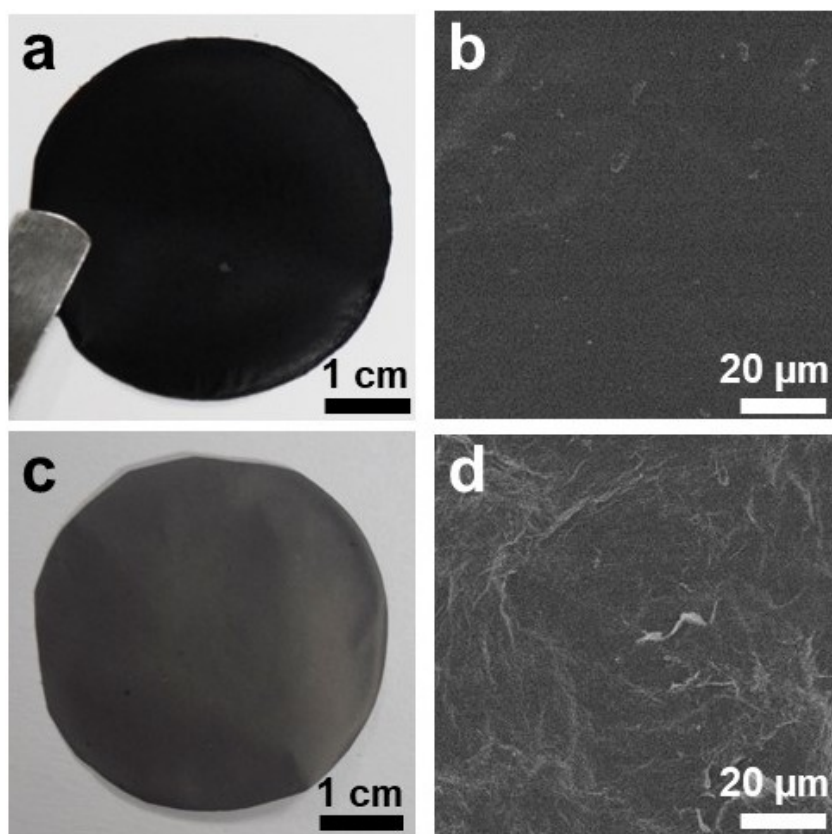

**Figure S3:** Digital photos of (a) agar side and (c) r-GO side of the bilayer membrane. FESEM images of (b) agar and (d) r-GO sides of the r-GO/agar bilayer membrane.

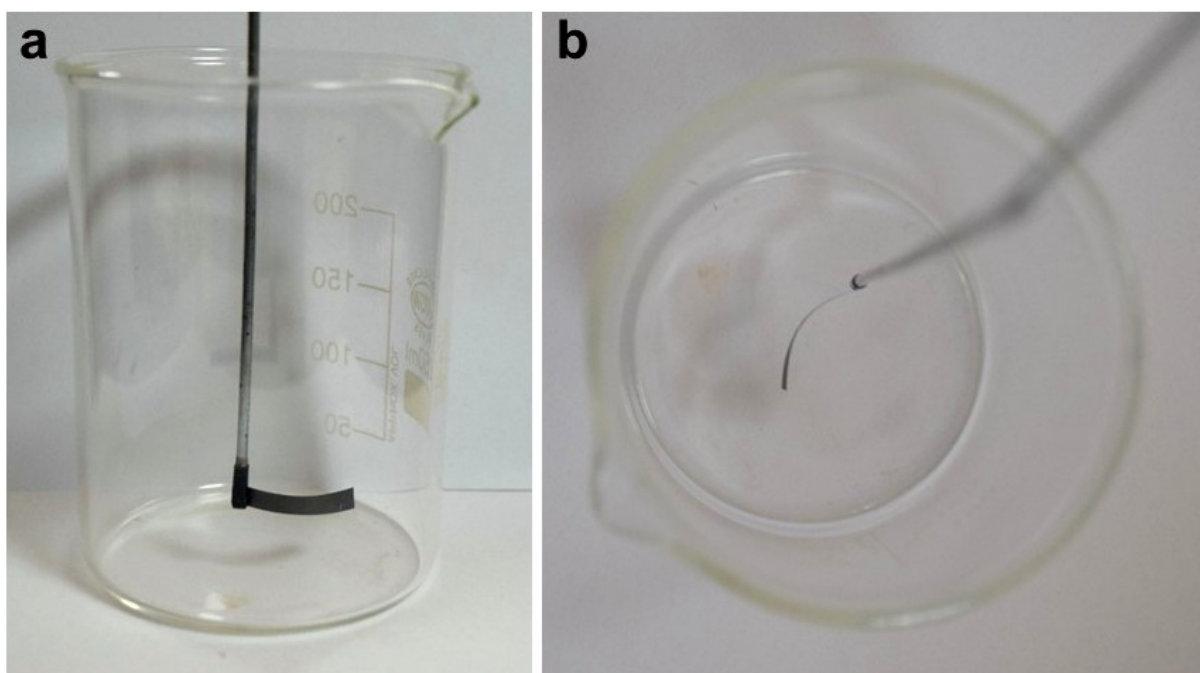

**Figure S4:** Digital photos showing the experimental setup used for studying the vapour induced shape alteration behaviour of the r-GO/agar bilayer strip (a) side view and (b) top view.

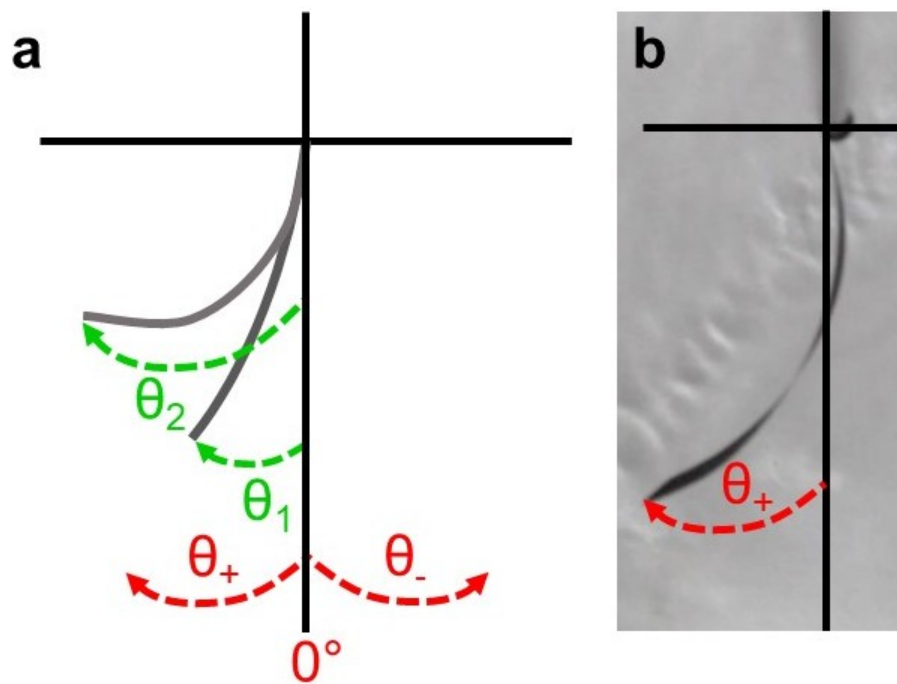

**Figure S5:** (a) Schematic diagram of the design employed for bending angle measurements, and (b) bending angle measured for the r-GO/agar bilayer strips in response to solvent vapours.



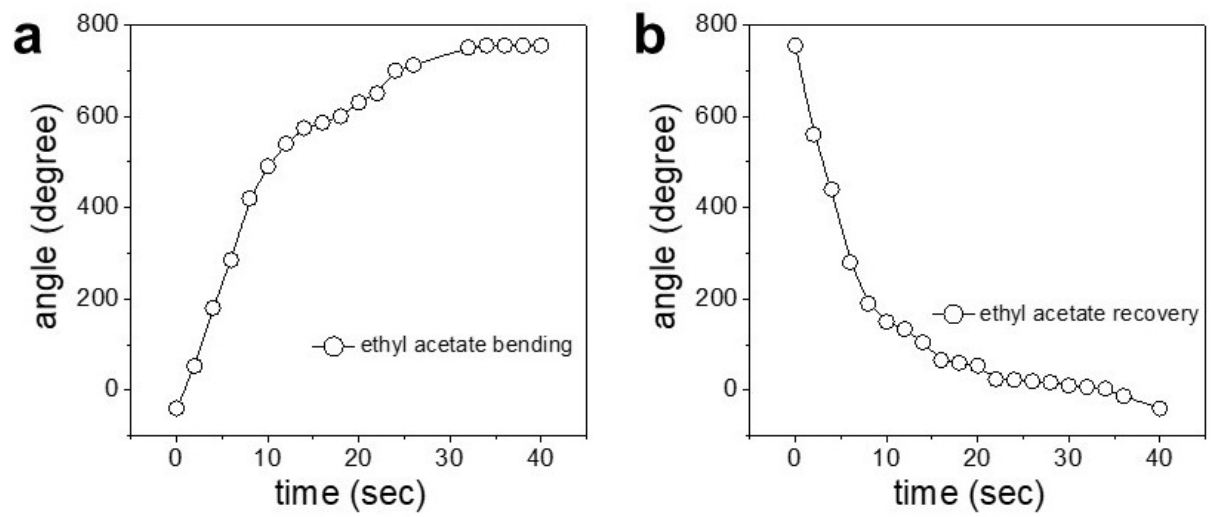

**Figure S6:** Plots showing the bending movements of the r-GO/agar bilayer strip (a) in ethyl acetate environment and (b) in open atmosphere

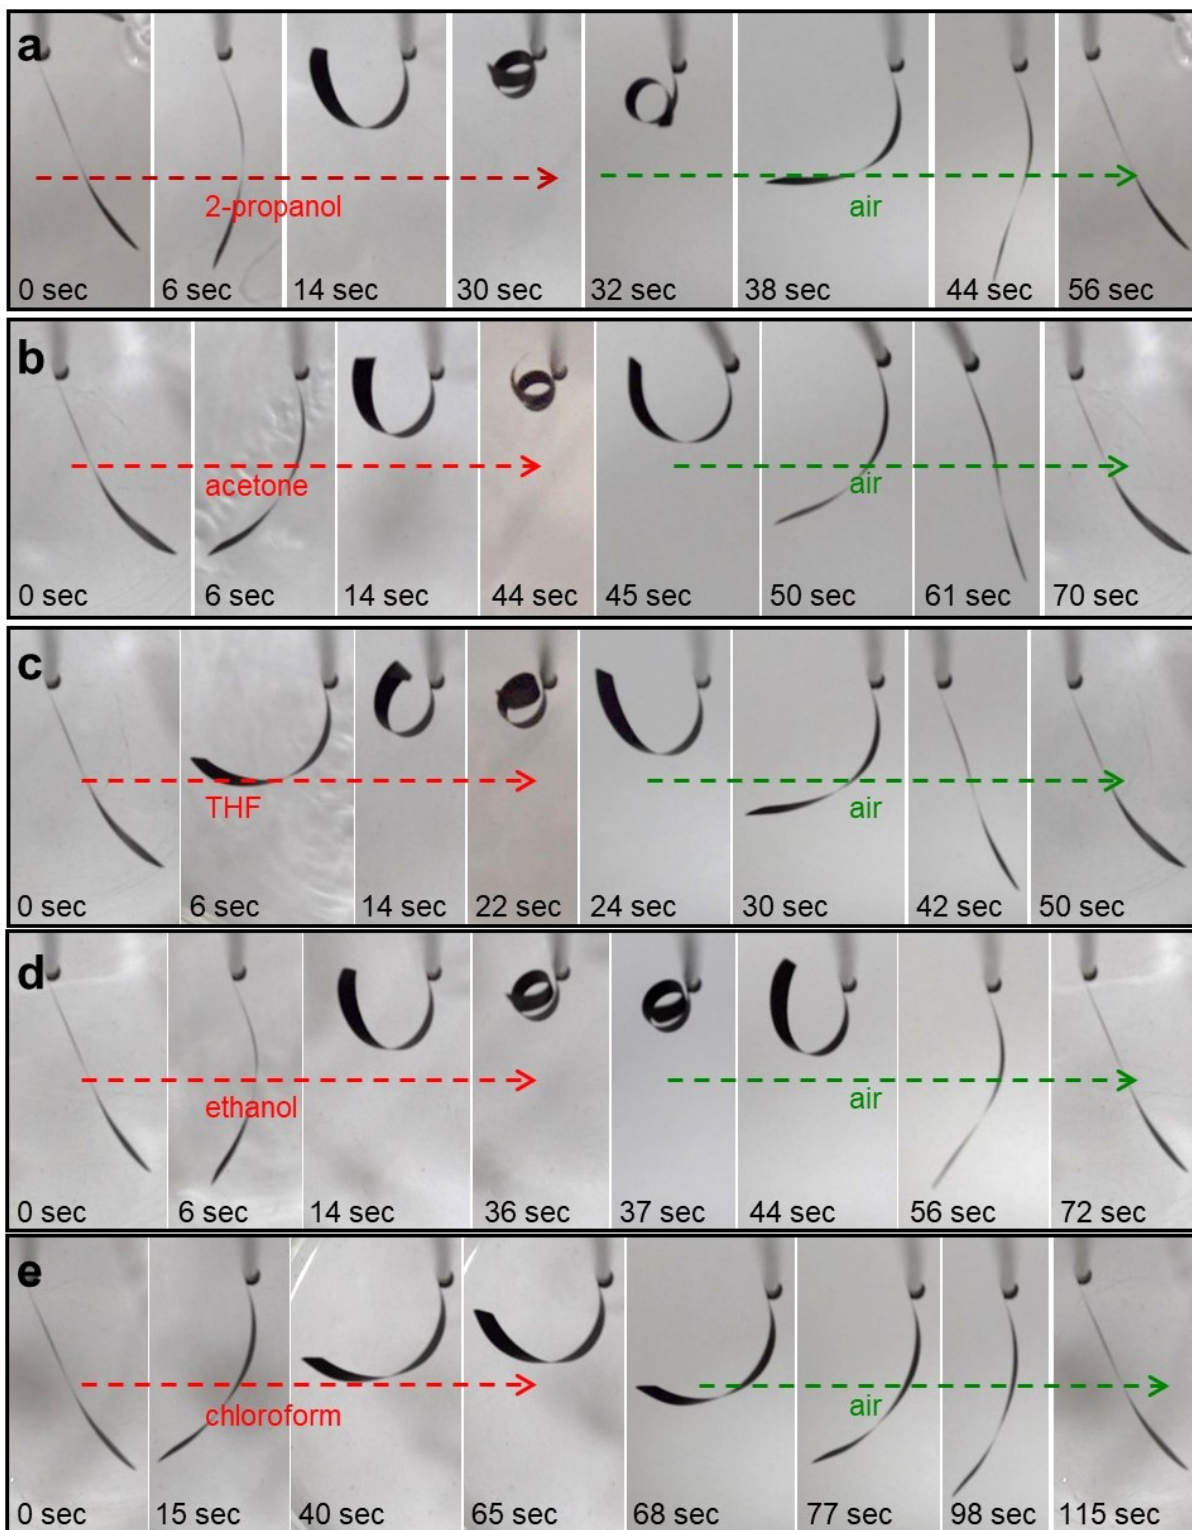

**Figure S7: Vapour induced responsiveness of the r-GO/agar bilayer membrane:** Snapshots showing the bending and recovery movements of a bilayer strip of r-GO/agar bilayer strip in presence of (a) 2-propanol, (b) acetone, (c) THF, (d) ethanol and (e) chloroform vapours.

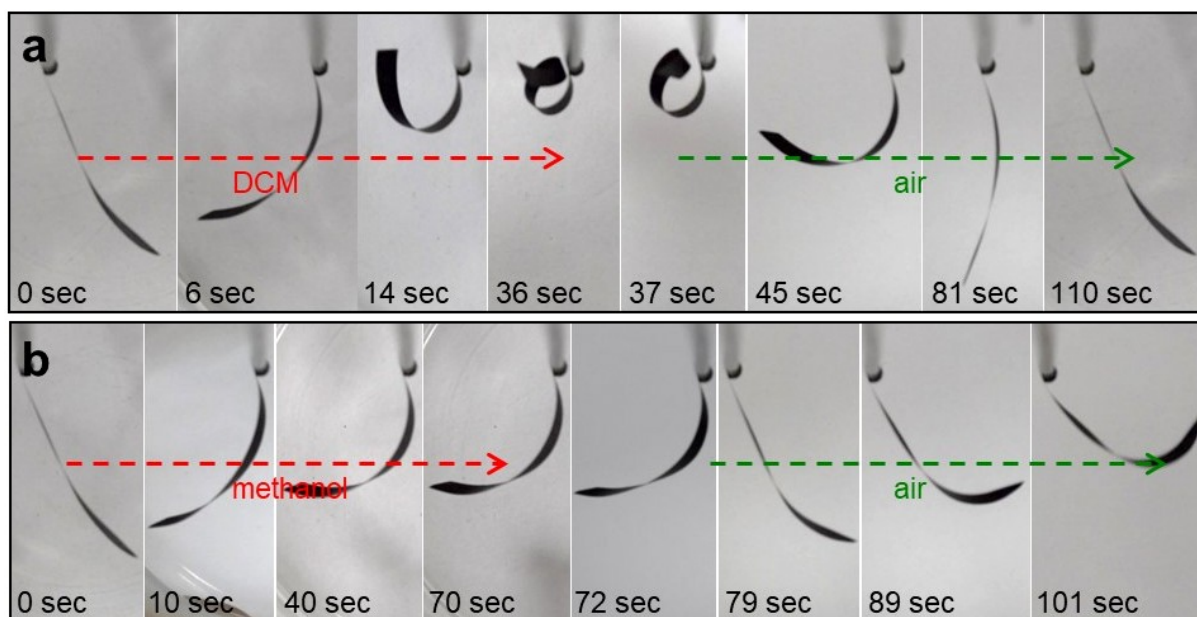

**Figure S8:** Snapshots showing the bending and recovery movements of a bilayer strip of r-GO/agar bilayer membrane in presence of (a) DCM and (b) methanol vapours.

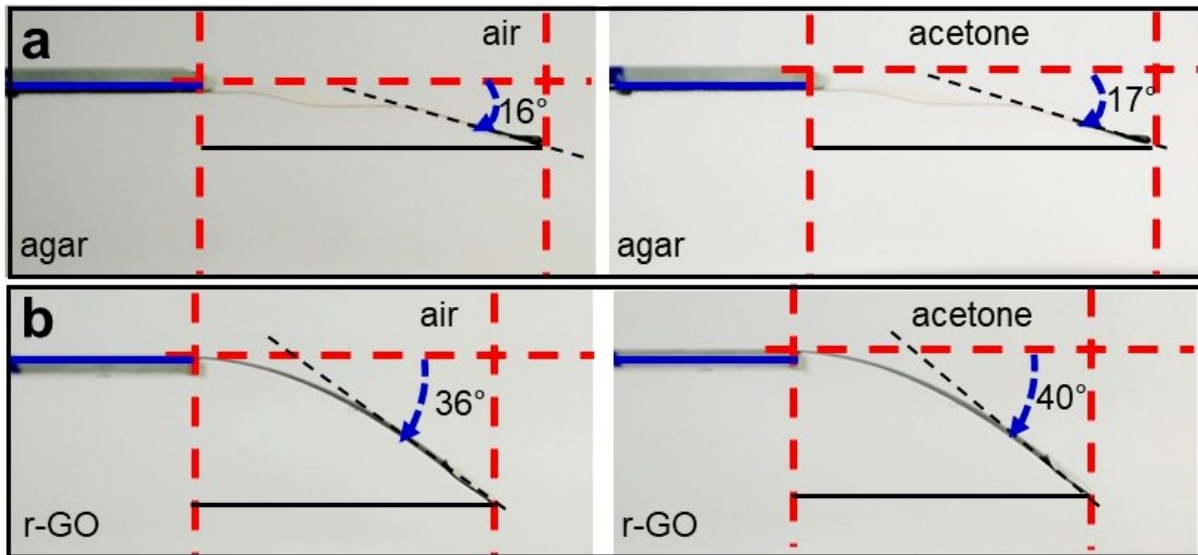

**Figure S9:** Measurement of solvent vapour induced bending stiffness alteration of the bilayer membrane. Snapshots of (a) agar and (b) r-GO strips with load applied on one end in open atmosphere and on exposing to vapours of acetone.

Lorentzen & Wettre 2-point method was employed to calculate the bending stiffness of the individual strips. Known loads were used to apply a force at one end while keeping the other end of the strip fixed to a glass slide. The weight and dimensions of the agar strip used for the experiment was 5.2 mg and 20 mm x 4 mm x 50  $\mu\text{m}$  respectively. Likewise, r-GO strip was handled a load of 2.5 mg having dimensions 20 mm x 4 mm x 42  $\mu\text{m}$ . Bending stiffness ( $S_b$ ) was calculated using the following equation:

$$S_b = \frac{60 \times F \times l^2}{\pi \times \theta \times b}$$

Where, bending force ( $F$ ) = weight  $\times$  gravitational constant,  $l$  = distance between the fixed end and the load,  $\theta$  = deflection,  $b$  = width of the strip. At first bending angle was calculated in open atmosphere after which strips were exposed to acetone vapours causing further bending.

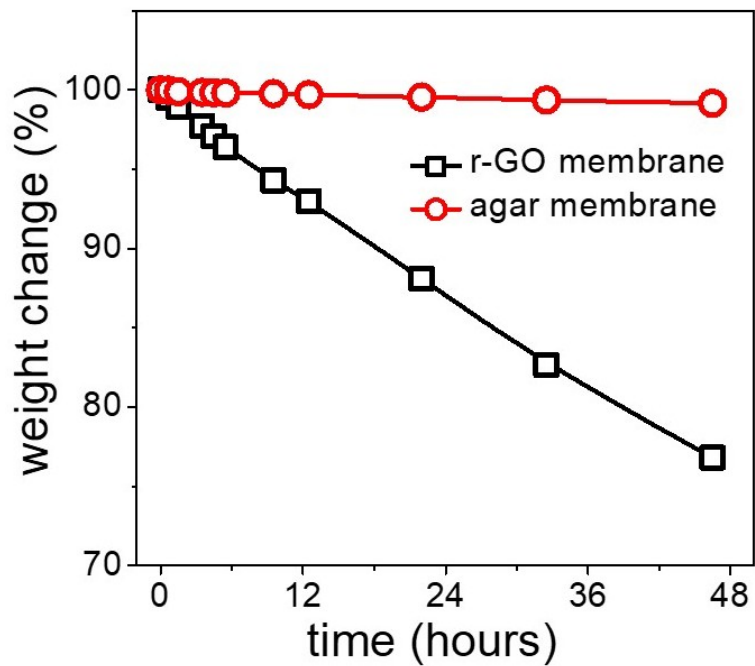

**Figure S10:** Change in weight % of the vials as a result of evaporation of acetone through the individual membranes. Significant weight loss was found in case of the vial covered with r-GO membrane as compared to that covered with agar membrane.

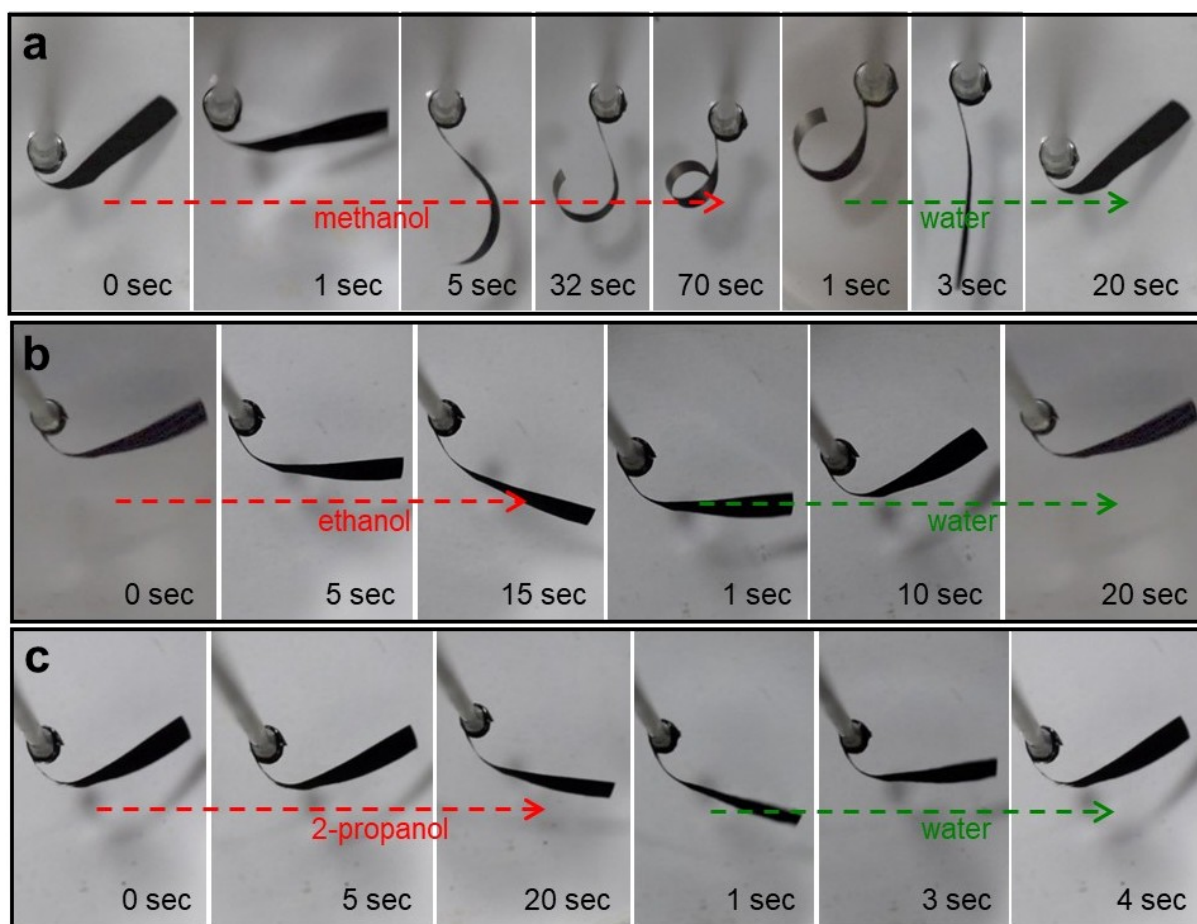

**Figure S11: Solvent induced responsiveness of r-GO/agar bilayer membrane:** Snapshots showing the bending of a bilayer strip of r-GO/agar bilayer membrane in (a) methanol, (b) ethanol and (c) 2-propanol solvents and its corresponding recovery in water.

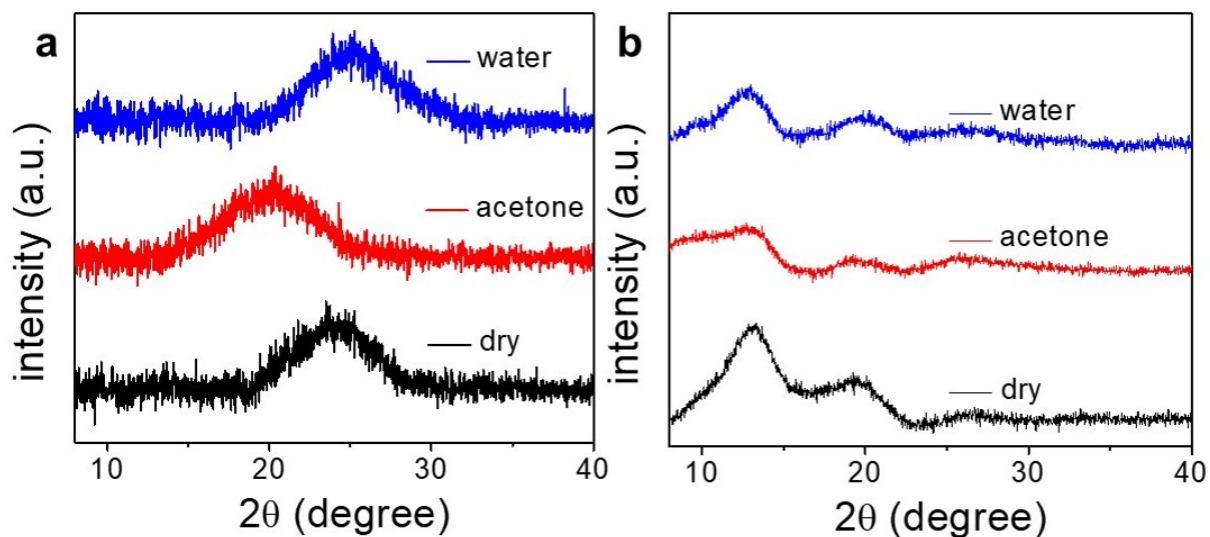

**Figure S12: Solvent induced variations in interlayer spacing's of individual membranes:** (a) r-GO membrane and (b) agar membrane. Significant variation in d-spacing's was seen in the case of the r-GO membrane but no such definite changes were observed for the agar membrane.



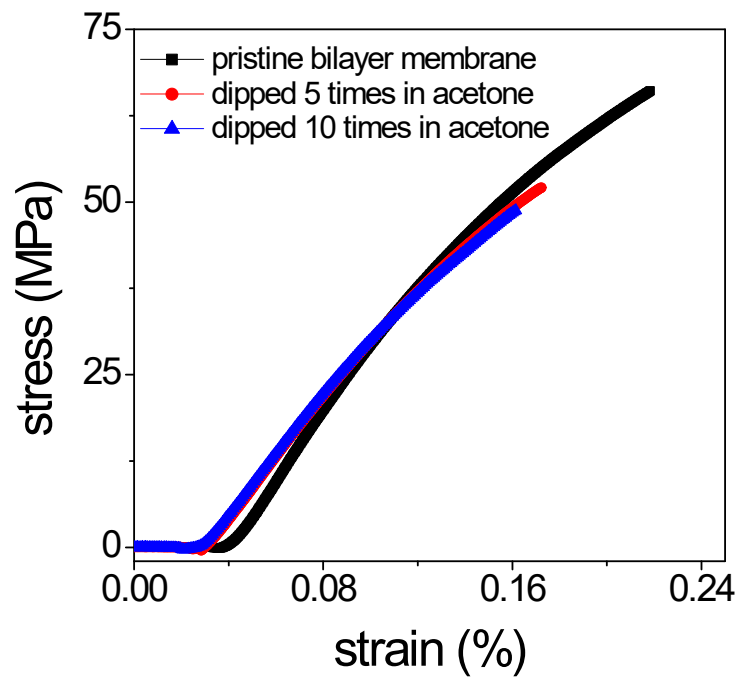

**Figure S13: Stress-strain curve:** Stress-strain curve of a strip of pristine bilayer membrane is compared with the ones dipped and taken out of acetone for 5 and 10 times respectively.



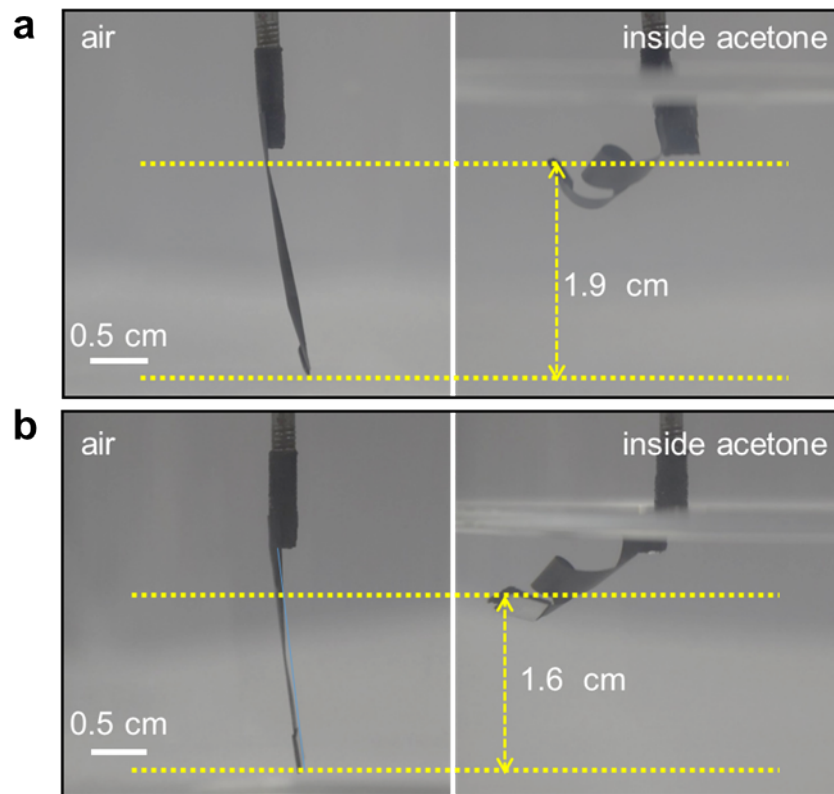

**Figure S14: Work done by the bilayer strip of r-GO/agar:** Snapshots showing lifting of weights by the bilayer strip upon dipping in liquid acetone. A strip weighing 2 mg (of dimensions  $20 \times 3 \times 0.023 \text{ mm}^3$ ) could lift a weight of (a) 3 mg up to 1.9 cm and (b) 10 mg up to 1.6 cm inside acetone.

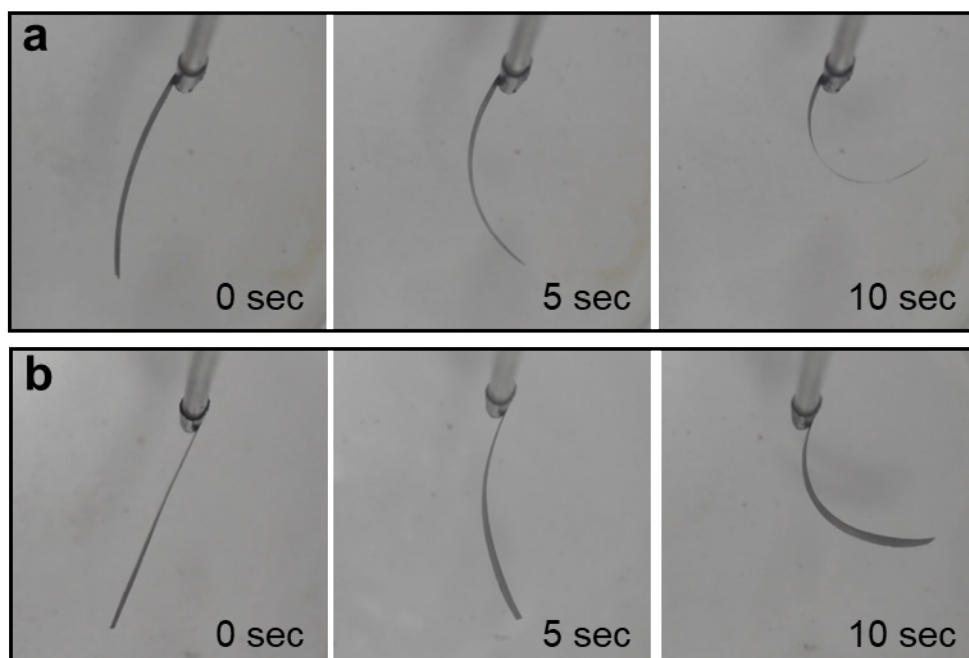

**Figure S15: Robustness of the r-GO/agar bilayer membrane:** Strips of the bilayer membrane were found to show responsive even after subjecting to extreme conditions. Photos showing acetone vapour induced bending movements of a bilayer strip after exposing to (a) concentrated HCl vapours and (b) NH<sub>3</sub> vapours for 6 hours.

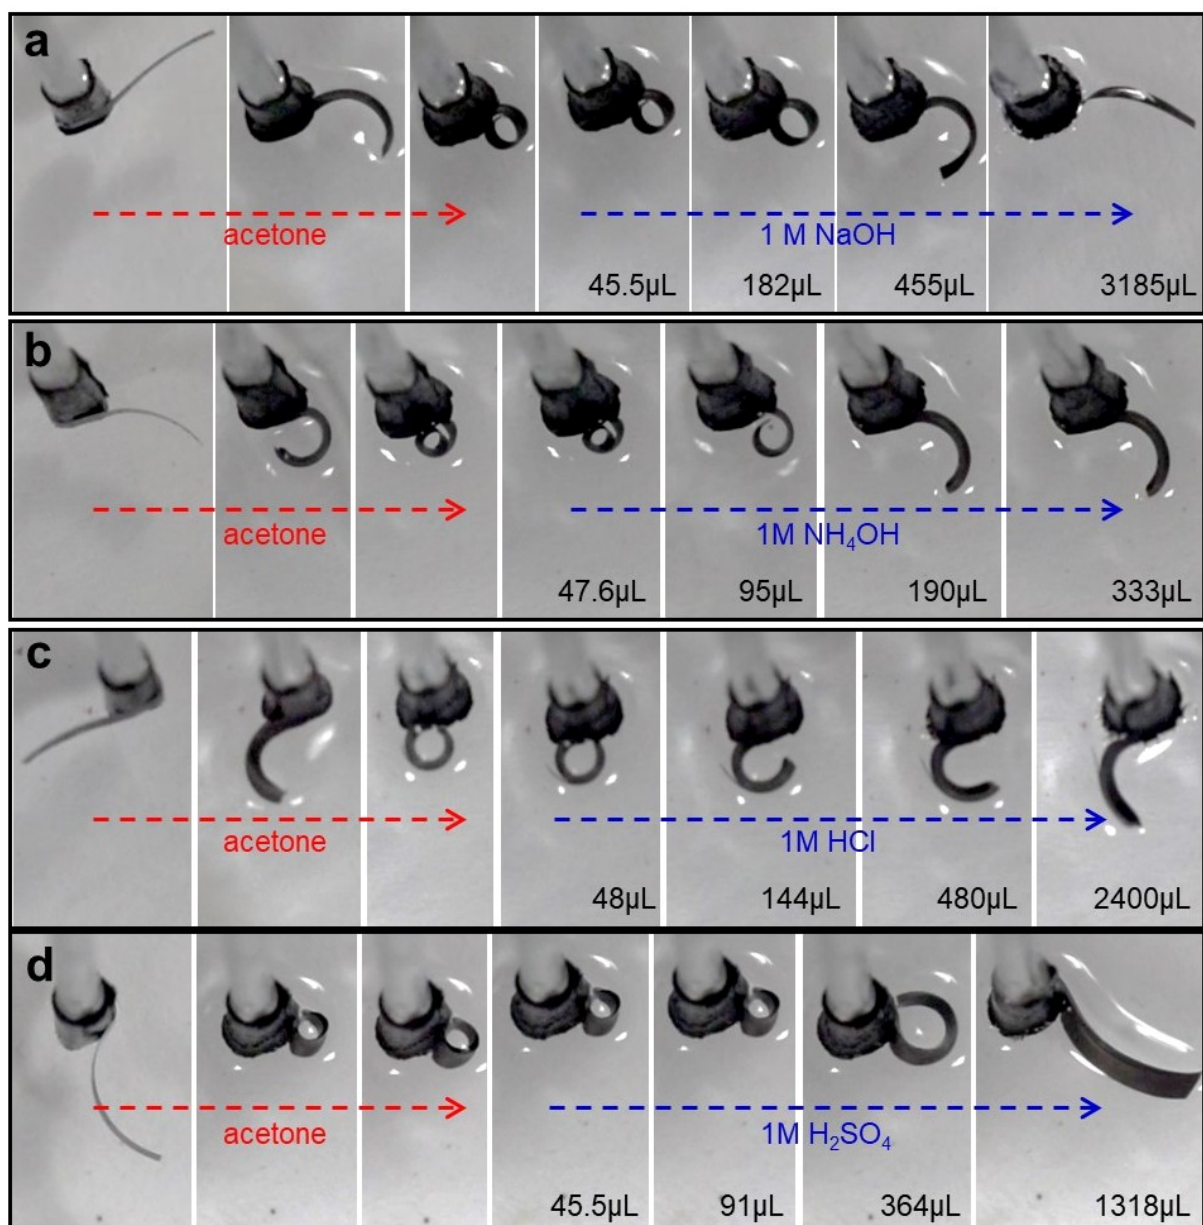

**Figure S16:** Snapshots showing the detection of trace amounts of aqueous impurities inside acetone by the r-GO/agar bilayer strips: (a) 1M NaOH, (b) 1M NH<sub>4</sub>OH, (c) 1M HCl and (d) 1M H<sub>2</sub>SO<sub>4</sub>.

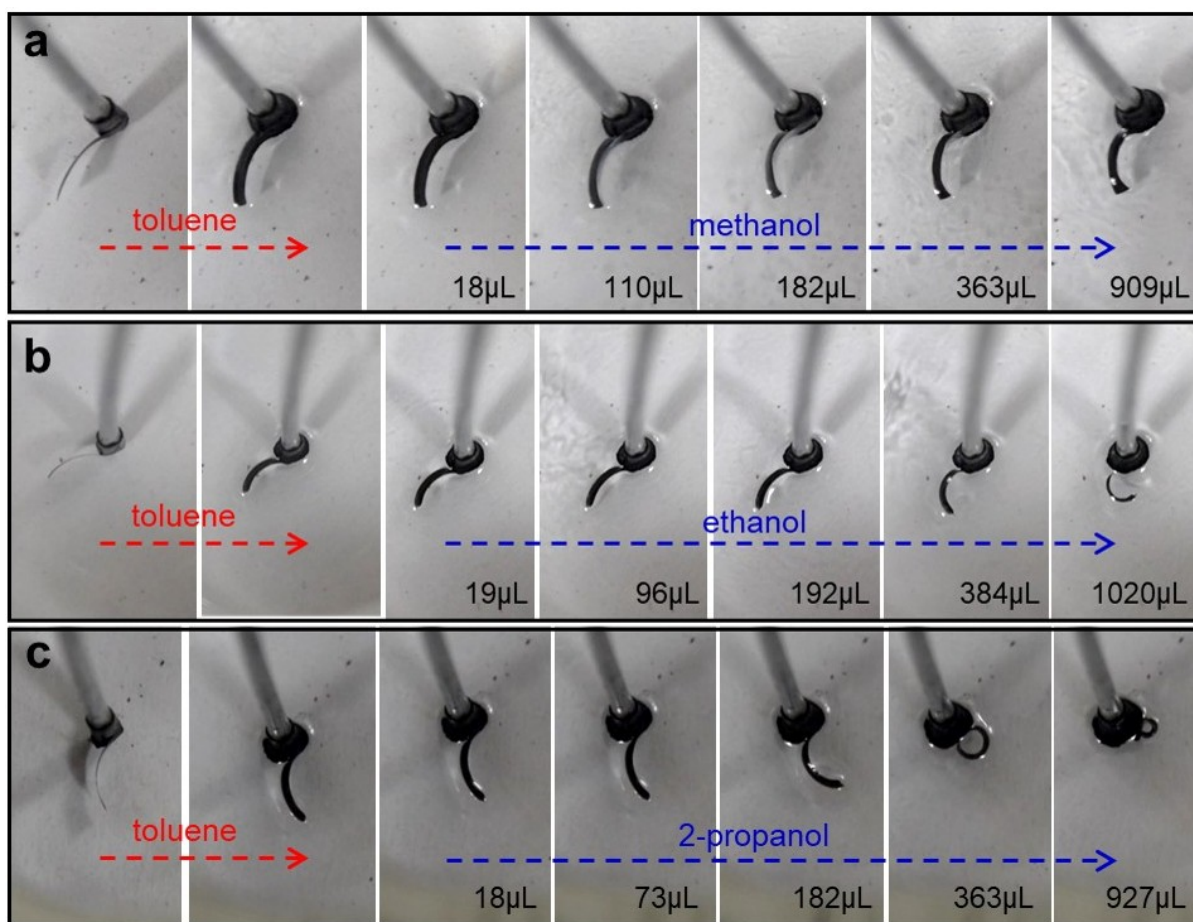

**Figure S17:** Snapshots showing the detection of trace amounts of alcohol impurities inside toluene by the r-GO/agar bilayer strips: (a) methanol, (b) ethanol and (c) 2-propanol.

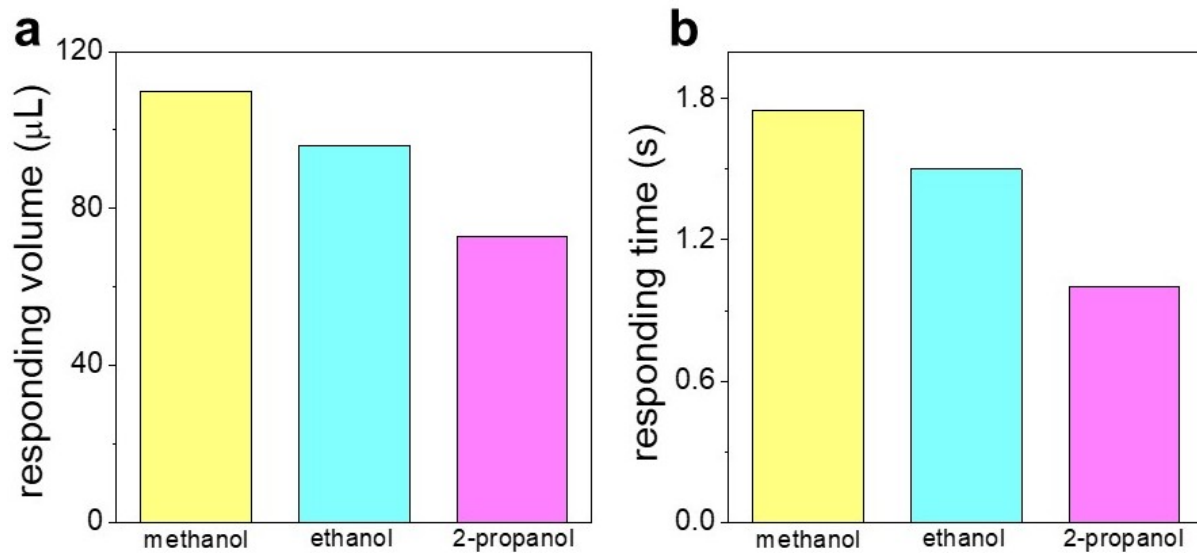

**Figure S18:** Bar diagrams showing (a) minimum responding volume and (b) minimum responding time of the r-GO/agar bilayer strips in the presence of trace amounts of alcohol impurities inside toluene.

## References:

- (1) F. Kim, J. Y. Luo, R. Cruz-Silva, L. J. Cote, K. Sohn and J. Huang, Self-Propagating Domino-like Reactions in Oxidized Graphite, *Adv. Funct. Mater.*, 2010, **20**, 2867-2873.
- (2) K. Ai, Y. Liu, L. Lu, X. Cheng and L. Huo, A novel strategy for making soluble reduced graphene oxide sheets cheaply by adopting an endogenous reducing agent, *J. Mater. Chem.*, 2011, **21**, 3365-3370.
- (3) G. T. S. How, A. Pandikumar, H. N. Ming and L. H. Ngee, Highly exposed {001} facets of titanium dioxide modified with reduced graphene oxide for dopamine sensing, *Sci. Rep.*, 2014, **4**, 5044.
- (4) S. Fang, D. Huang, R. Lv, Y. Bai, Z. -H. Huang, J. Gu and F. Kang, Three-dimensional reduced graphene oxide powder for efficient microwave absorption in the S-band (2-4 GHz), *RSC Adv.*, 2017, **7**, 25773-25779.
- (5) T. N. Lin, M. R. Inciong, S. R. M. S. Santiago, T. W. Yeh, W. Y. Yang, C. T. Yuan, J. L. Shen, H. C. Kuo and C. H. Chiu, Photo-induced Doping in GaN Epilayers with Graphene Quantum Dots, *Sci. Rep.*, 2016, **6**, 23260.
